# Supplementary material for: Disrupted uromodulin trafficking is rescued by targeting TMED cargo receptors
Source: PubMed Central journal article supplement (PMC11645142; doi:10.1172/jci180347), 2024-12-16
Supplement: jci-134-180347-s008.pdf [file jci-134-180347-s008.pdf]

**Supplementary Table 1. List of antibodies.**

| <b>Antibody</b>                                          | <b>Source</b>                             | <b>Identifier</b>                                                                                                                                   |
|----------------------------------------------------------|-------------------------------------------|-----------------------------------------------------------------------------------------------------------------------------------------------------|
| <i><b>Tissue IF and Western blot</b></i>                 |                                           |                                                                                                                                                     |
| Sheep polyclonal anti-Uromodulin                         | Meridian Life Sciences                    | Cat#: K90071C;<br>RRID:AB_153128                                                                                                                    |
| Mouse monoclonal anti-TMED2 (E-12)                       | Santa Cruz Biotechnology                  | Cat#: sc-376458;<br>RRID:AB_11151031                                                                                                                |
| Rabbit polyclonal anti-TMED10                            | Bethyl Laboratories                       | Cat#: A305-219A;<br>RRID:AB_2631612                                                                                                                 |
| Rabbit polyclonal anti-TMED9                             | Proteintech                               | Cat#: 21620-1-AP;<br>RRID: AB_10858623                                                                                                              |
| Mouse monoclonal anti-TMED10                             | Santa Cruz Biotechnology                  | Cat# sc-376459;<br>RRID:AB_11150297                                                                                                                 |
| Rabbit polyclonal anti-Calnexin                          | Abcam                                     | Cat#: ab22595;<br>RRID: AB_2069006                                                                                                                  |
| Rabbit polyclonal anti-CD45                              | Abcam                                     | Cat#: ab10558;<br>RRID: AB_442810                                                                                                                   |
| Armenian monoclonal hamster anti-MUC1                    | Abcam                                     | Cat#: ab80952;<br>RRID: AB_1640314                                                                                                                  |
| Fluorescein labeled<br>Lotus Tetragonolobus Lectin (LTL) | Vector Laboratories                       | Cat#: FL-1321;<br>RRID: AB_2336559                                                                                                                  |
| Rabbit polyclonal anti-C125RUMOD                         | Innovagen                                 | The antibody was raised against<br>the mouse UMOD sequence<br>(CHALATRVNTEGD)                                                                       |
| Mouse monoclonal anti $\alpha$ -sma                      | Sigma-Aldrich                             | Cat# A5228,<br>RRID:AB_262054                                                                                                                       |
| Guinea pig polyclonal anti-NKCC2                         | In-house developed by the<br>Bachmann Lab | The antibody was raised against<br>85 NH2 -terminal amino acids of<br>NKCC2 (for more information<br>please refer to Schmitt R et al.<br>2003 (59)) |
| Rabbit monoclonal anti-XBP1-s (D2C1F)                    | Cell Signaling Technology                 | Cat#: 12782;<br>RRID:AB_2687943                                                                                                                     |
| Rabbit monoclonal anti-Vinculin (E1E9V) XP               | Cell Signaling Technology                 | Cat#: 18799;<br>RRID:AB_2728768                                                                                                                     |
| Rabbit polyclonal anti $\alpha/\beta$ -tubulin           | Cell Signaling Technology                 | Cat#: 2148S;<br>RRID:AB_2288042                                                                                                                     |

| <b>Western blot in cells</b>                                  |                           |                                        |
|---------------------------------------------------------------|---------------------------|----------------------------------------|
| Mouse monoclonal anti-FLAG                                    | Sigma-Aldrich             | Cat# F3165;<br>RRID:AB_259529          |
| Mouse monoclonal anti-GFP (4B10)                              | Cell Signaling Technology | Cat# 2955;<br>RRID:AB_1196614          |
| Mouse monoclonal anti-V5                                      | Thermo Fisher Scientific  | Cat# R961-25;<br>RRID:AB_2556565       |
| Mouse monoclonal anti-Myc                                     | Santa Cruz Biotechnology  | Cat# sc-40;<br>RRID:AB_627268          |
| <b>4i</b>                                                     |                           |                                        |
| Rabbit polyclonal anti-TMED9                                  | Proteintech               | Cat#: 21620-1-AP;<br>RRID: AB_10858623 |
| Rabbit polyclonal anti-ERGIC-53                               | Proteintech               | Cat# 13364-1-AP;<br>RRID:AB_2135994    |
| Mouse monoclonal anti-GM130                                   | BD Biosciences            | Cat# 610822;<br>RRID:AB_398141         |
| Mouse monoclonal anti-Sec13 (F-6)                             | Santa Cruz Biotechnology  | sc-514308,<br>RRID:AB_2186242          |
| Rabbit polyclonal anti-COPB2                                  | Thermo Fisher Scientific  | Cat# PA5-96557;<br>RRID:AB_2808359     |
| Mouse monoclonal anti-Rab7                                    | Cell Signaling Technology | Cat# 95746;<br>RRID:AB_2800252         |
| Rabbit monoclonal anti-EEA1 (C45B10)                          | Cell Signaling Technology | Cat# 3288;<br>RRID:AB_2096811          |
| Mouse monoclonal anti-TGN38                                   | Novus Biologicals         | Cat# NB300-575;<br>RRID:AB_2240559     |
| Rabbit polyclonal anti-Calnexin                               | Abcam                     | Cat# ab22595;<br>RRID:AB_2069006       |
| <b>Secondaries</b>                                            |                           |                                        |
| Goat anti-Rabbit IgG (H+L) Cross-Absorbed,<br>Alexa Fluor 488 | Thermo Fisher Scientific  | Cat# A-11008;<br>RRID:AB_143165        |

|                                                                                                |                          |                                      |
|------------------------------------------------------------------------------------------------|--------------------------|--------------------------------------|
| Goat anti-Mouse IgG (H+L) Cross-Absorbed, Alexa Fluor 488                                      | Thermo Fisher Scientific | Cat# A-11001;<br>RRID:AB_2534069     |
| Donkey anti-Sheep IgG (H+L) Cross-Absorbed, Alexa Fluor 568                                    | Thermo Fisher Scientific | Cat# A-21099;<br>RRID:AB_10055702    |
| Goat anti-Rabbit IgG (H+L) Cross-Absorbed, Alexa Fluor 568                                     | Thermo Fisher Scientific | Cat# A-11011;<br>RRID:AB_143157      |
| Goat anti-Mouse IgG (H+L) Cross-Absorbed, Alexa Fluor 568                                      | Thermo Fisher Scientific | Cat# A-11004;<br>RRID:AB_2534072     |
| Goat anti-Armenian Hamster IgG (H+L) Highly Cross-Adsorbed Secondary Antibody, Alexa Fluor 647 | Thermo Fisher Scientific | Cat# A78967,<br>RRID:AB_2925790      |
| Goat anti-Guinea Pig IgG (H+L) Highly Cross-Adsorbed Secondary Antibody, Alexa Fluor 647       | Thermo Fisher Scientific | Catalog # A-21450,<br>RRID:AB_141882 |
| Donkey, polyclonal Cy3-coupled donkey anti-mouse IgG                                           | Dianova                  | Cat# 715-165-150,<br>RRID:AB_2340813 |

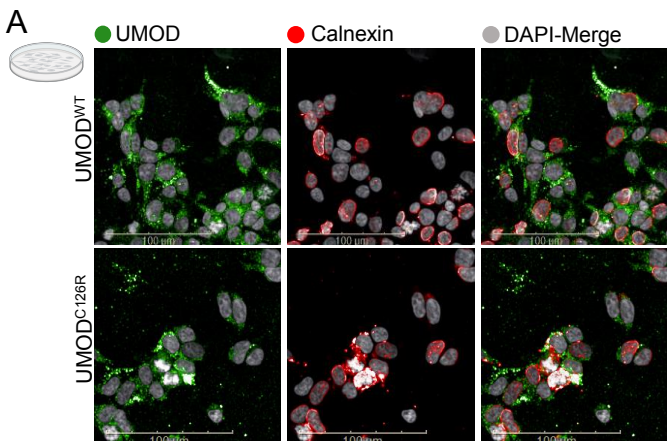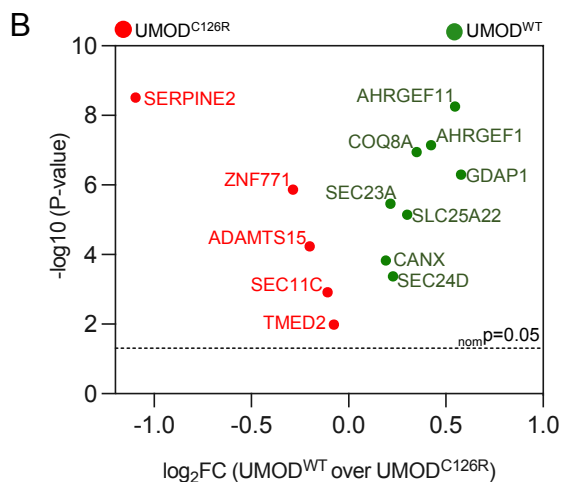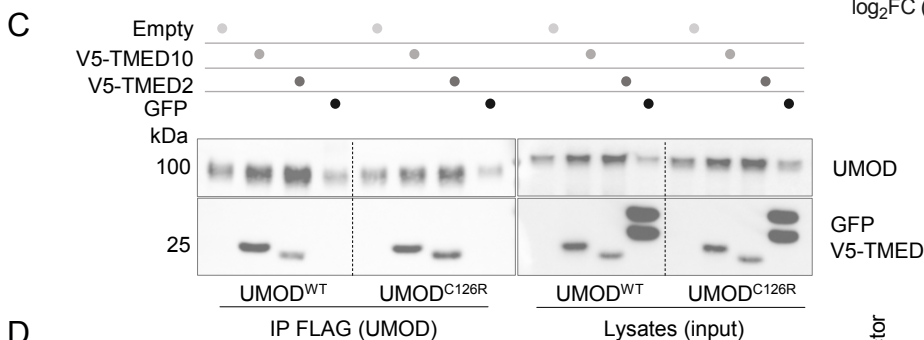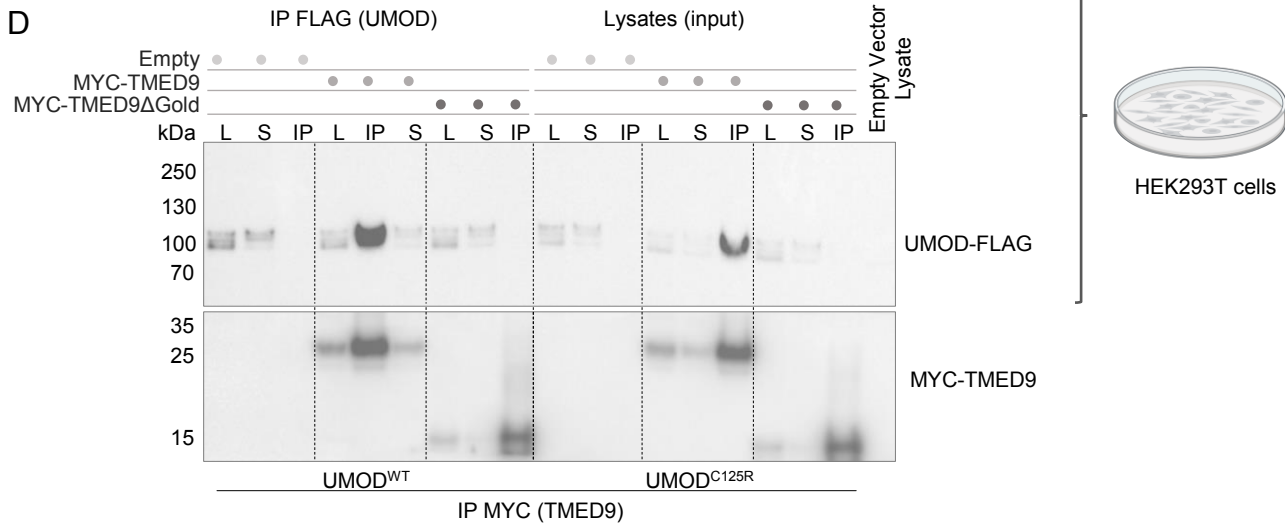

**Supplementary Figure 1. Uromodulin binds the TMED family of cargo receptors.** **A.** Immunofluorescence images of HEK293T cells transiently transfected with wild-type UMOD (UMODWT) or mutant misfolded UMOD (UMODC126R), fixed and stained for UMOD (green), DAPI (gray), and calnexin (red) to corroborate ER retention. Scale bar = 100  $\mu$ m **B.** Volcano plots depicting IP-MS of flag-tagged-UMOD wild-type (UMODWT) or mutant misfolded UMOD (UMODC126R) from HEK293T cells. The x-axis shows the log<sub>2</sub> fold-change of protein enrichment in the wild-type protein (WT) pulldown over the mutant (C126R) pulldown. Significant interactors are highlighted in red and green. The right hand-side of the volcano plot depicts the proteins (green) that preferentially bind to wild-type UMOD. The left-hand side of the volcano plot depicts the proteins (red) that preferentially bind to mutant-misfolded UMOD. n=3 technical replicates. **C.** Co-immunoprecipitation of FLAG from HEK293T cells co-transfected with wildtype UMOD (UMODWT) or mutant UMOD (UMODC125R), both FLAG-tagged, and TMED10 or TMED2 (both V5-tagged). An additional group was co-transfected with UMOD and GFP to show specificity of TMED binding. Left, immunoprecipitation. Right, whole-cell lysate that served as input. **D.** Co-immunoprecipitation of Myc from HEK293T cells co-transfected with wild-type UMOD (UMODWT) or mutant UMOD (UMODC125R), both FLAG-tagged, and Myc-tagged TMED9 or Myc-TMED $\Delta$ GOLD, a TMED9 mutant lacking the cargo-binding GOLD domain. L=Lysate, S=Supernatant, IP=immunoprecipitation.

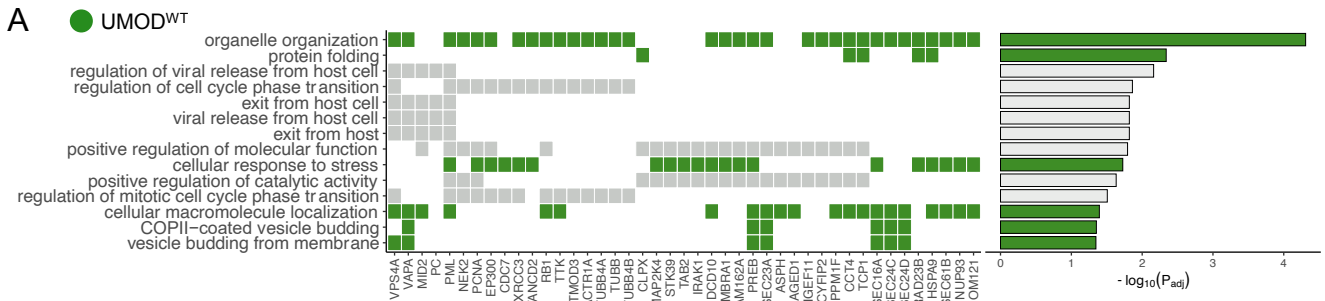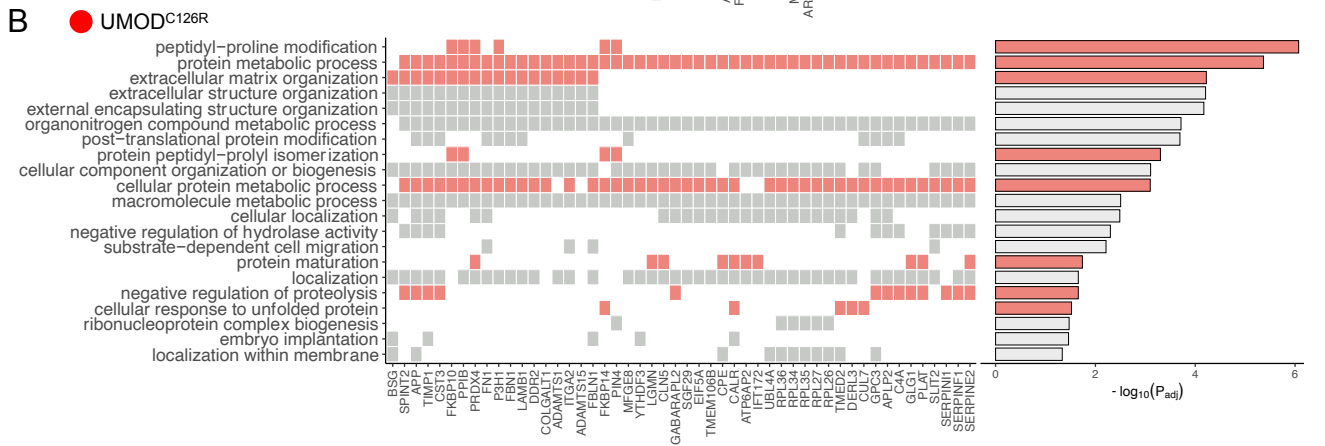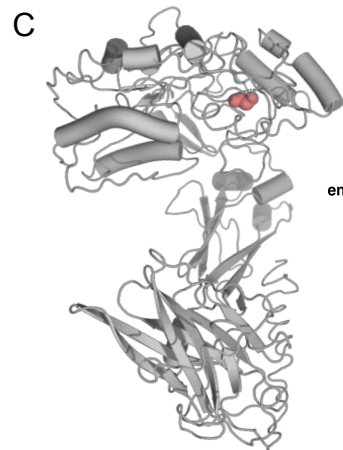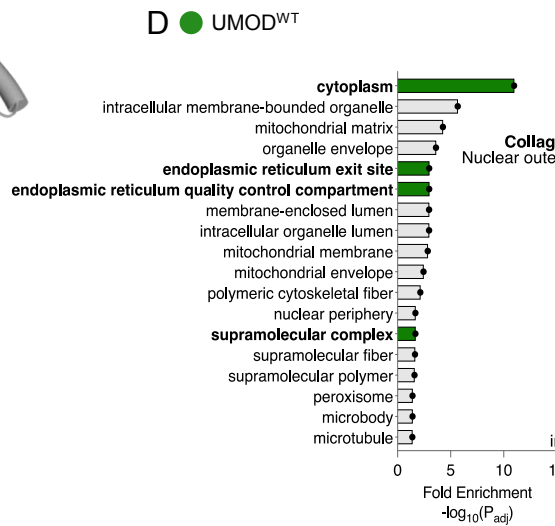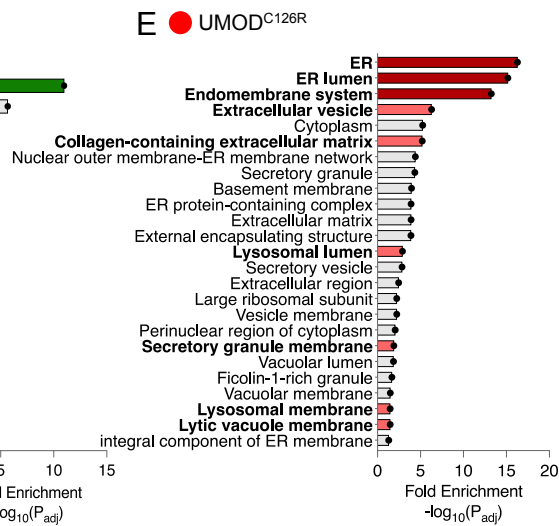

**Supplementary Figure 2. The Uromodulin interactome.** Functional annotation of proteins significantly enriched in UMOD's interactome. Gene Ontology (GO) enrichment analysis was performed in the web tool gProfiler with the list of genes significantly enriched ( $p \leq 0.05$ ). GO representing Biological Pathways (**A. and B.**) and Cell Component (**D. and E.**) are presented in different graphs. Redundant terms were removed from graphs. Relevant terms are highlighted in Bold Font. **C.** TSSER UMOD structure based on 4wrn, modeled in PyMol. The location of C126 (the cysteine mutation that we studied in this project) is indicated with red spheres. The predicted structure of uromodulin contains four EGF-like domains, a cysteine-rich D8C domain (far left), and a bipartite Zona Pellucida domain (far right). All domains were gray-shaded for simplicity. Mutation C126R is in the EGF-like domain III.

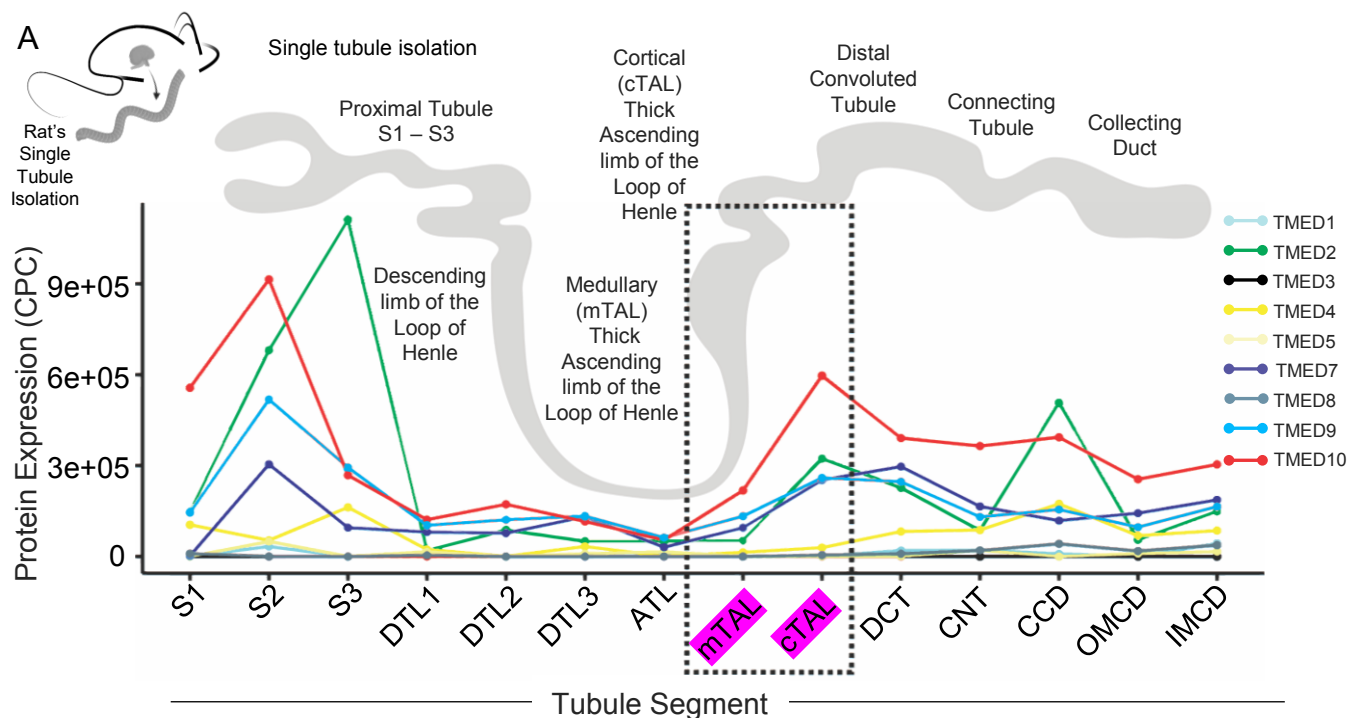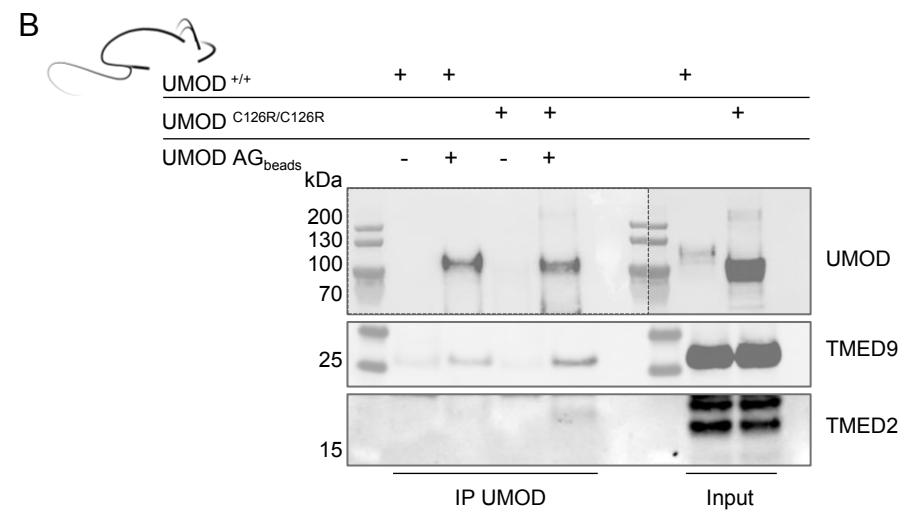



**Supplementary Figure 3. TMED expression along the nephron and relevant in vivo interaction between TMEDs and UMOD.**

**A.** Relative protein expression levels of the TMEDs in renal tubule segments. Data analyzed from Limbutara et al. JASN 2020 (available at ProteomeXchange Consortium (<http://proteomecentral.proteomexchange.org>)). **B.** Co-immunoprecipitation of UMOD from whole-kidney extract of wild-type (UMOD<sup>+/+</sup>) or homozygous mutant (UMOD<sup>C125R/C125R</sup>) mice. We used agarose beads bound to a mouse monoclonal antibody that recognizes UMOD (UMOD AG beads) or agarose beads bound to control mouse IgG isotype. At left, immunoprecipitation (IP UMOD). At right, whole-kidney lysate that served as the input.

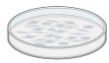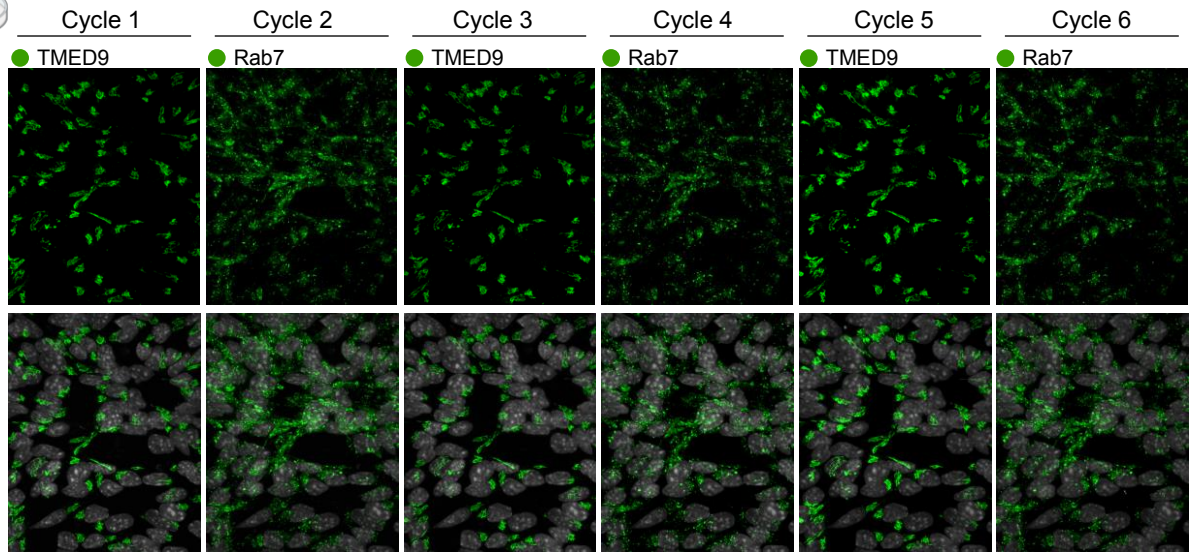

**Supplementary Figure 4. Iterative Indirect Immunofluorescence Imaging (4i) of Uromodulin in epithelial cells.** Representative immunofluorescence images depicting the efficacy of antibody elution and re-staining across successive imaging cycles in the same cells. The green depicts either TMED9 or Rab7, depending on the cycle.

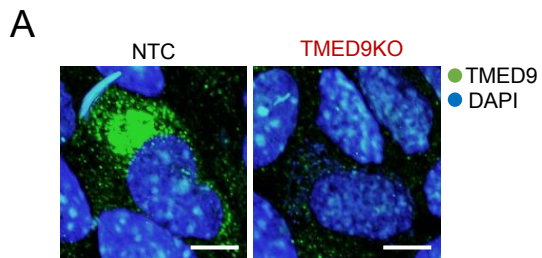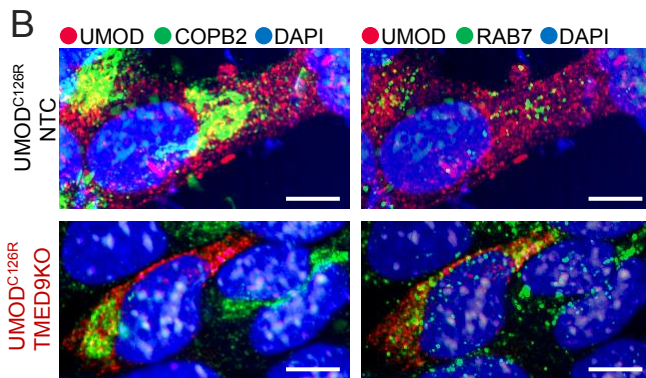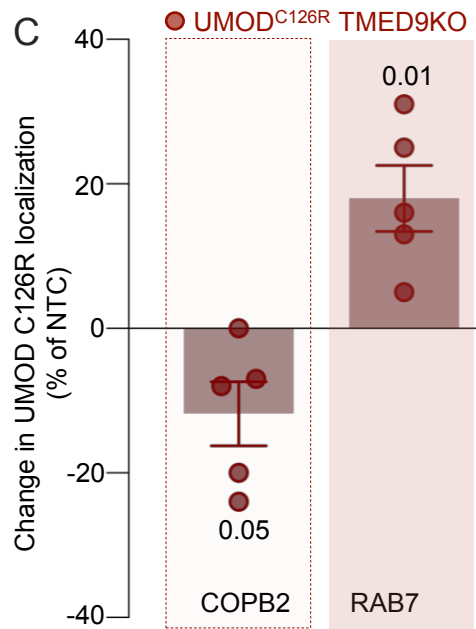

**Supplementary Figure 5. TMED9 deletion recapitulates BRD4780-induced forward trafficking of mutant UMOD.** **A.** Immunofluorescence images of AtT20 stably transfected with UMOD<sup>C126R</sup> with/without CRISPR/Cas9 stable TMED9 deletion. NTC=Non-Targeting Control guide RNA, TMED9KO=TMED9-targeting guide RNA. Scale bar = 25  $\mu$ m. **B.** Immunofluorescence images of AtT20 cells stably transfected with mutant misfolded UMOD (UMOD<sup>C126R</sup>) in either NTC or TMED9KO conditions. 4i was performed as described in the Methods. Scale bar = 25  $\mu$ m. **C.** Quantification of B. represented as change induced by TMED9KO from a baseline of the cells transfected with NTC. n=6 technical replicates. One sample t-test against a theoretical mean of 0. Each data point represents the mean values per well of all the cells in a well. Mean $\pm$ SEM.

A

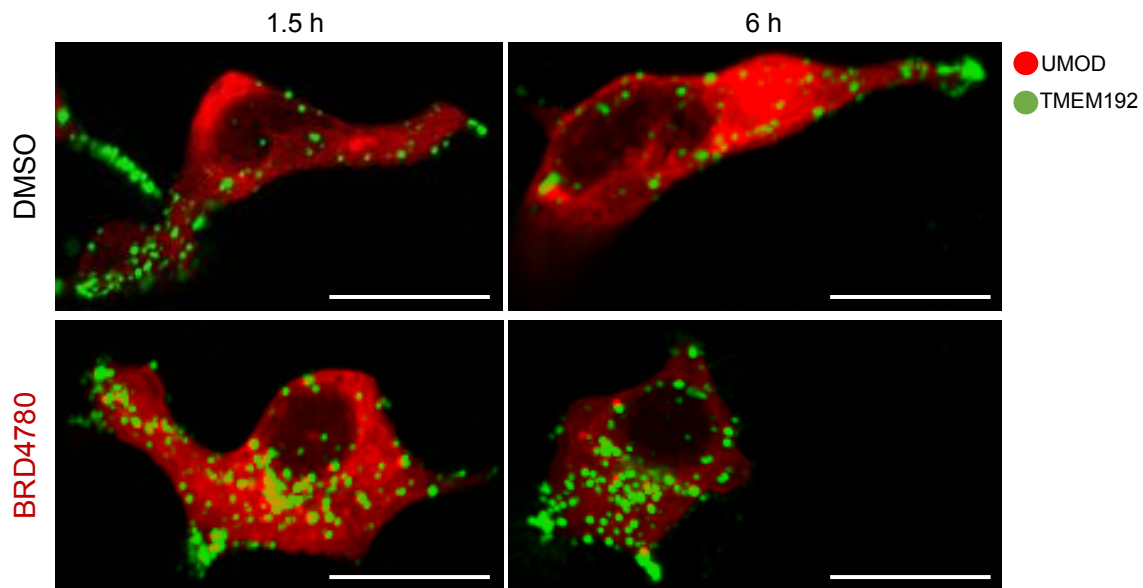

B

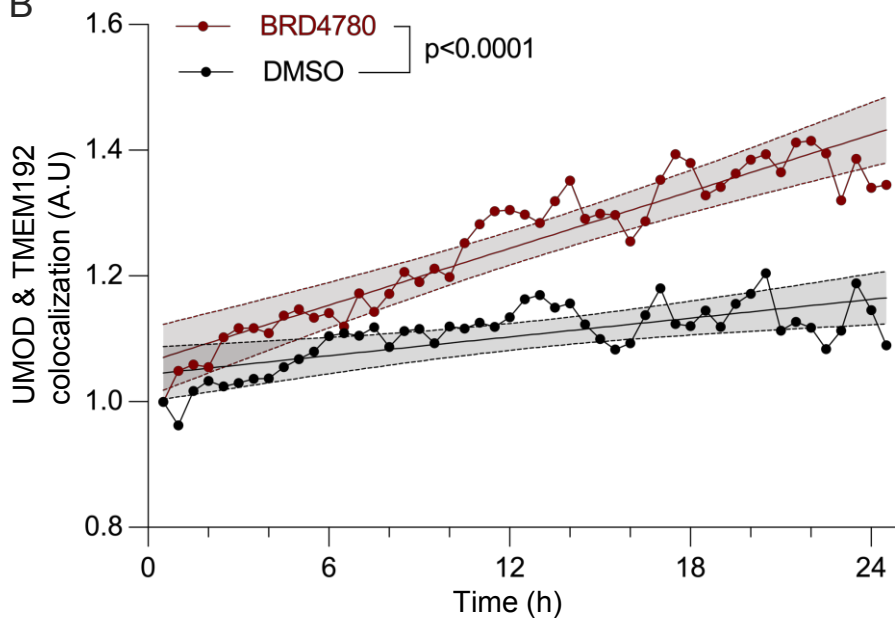

**Supplementary Figure 6. BRD treatment promotes colocalization of UMOD and lysosomal markers over time. A.** Immunofluorescence images depicting the subcellular localization dynamics of mutant UMOD (UMODC126R) fused to the mScarlet fluorescent protein (UMODC126R-mScarlet) and a construct encoding the lysosomal protein TMEM192 tagged with GFP (TMEM192-GFP). HEK293T cells were treated for 24-hours with either DMSO or 5  $\mu$ M BRD4780. Scale bar = 10  $\mu$ m. **B.** Quantification of overlap between UMODC126R-mScarlet- and TMEM192-GFP-positive areas. Linear regression analysis shows significantly different ( $p$ -value $<0.0001$ ) slopes of straight interpolation lines between both treatment groups, demonstrating the efficacy of BRD4780 to increase colocalization of UMOD and TMEM192. Shown are aggregate data from two biological replicates. 95% confidence intervals are indicated by colored bands, black for DMSO, red for BRD4780. Data points represent the Mean $\pm$ SEM of two independent experiments, each experiment has 3 technical replicates (n=6 wells per condition).

A

UMOD<sup>+/C125R</sup>

Vehicle

BRD4780

CD45

DAPI

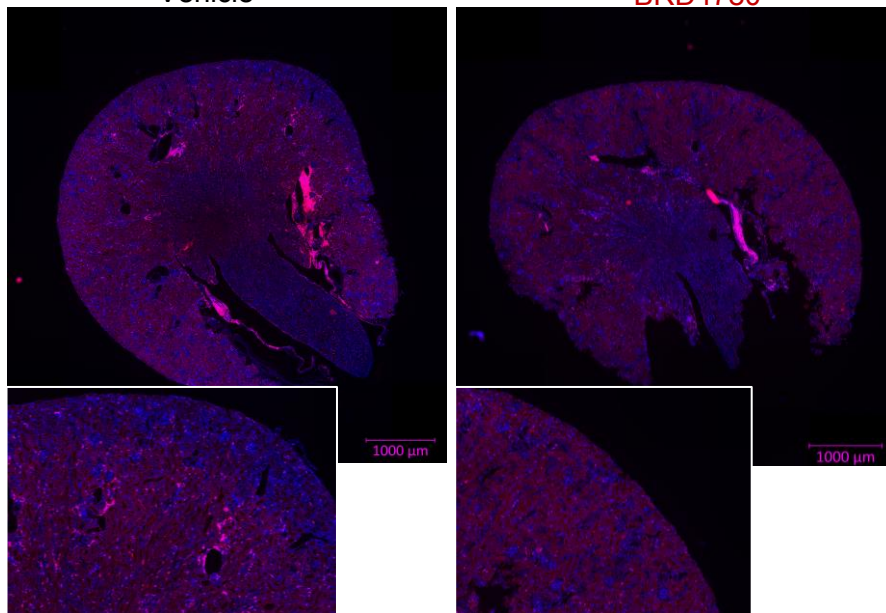

B

UMOD<sup>+/+</sup>

Vehicle

Vehicle

UMOD<sup>+/C125R</sup>

BRD4780

PAS

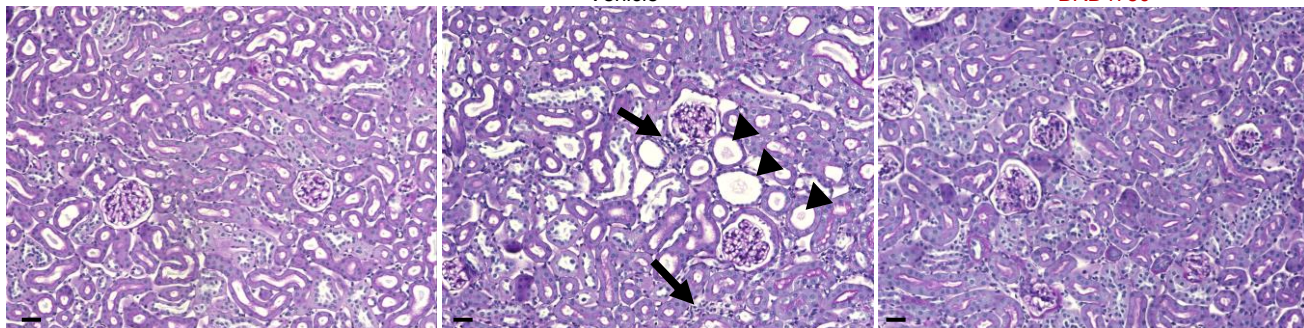

**Supplementary Figure 7. Assessment of leukocyte Infiltration via CD45 Staining and histological alterations via PAS Staining. A.** Low magnification (10x) images of whole kidney sections from the vehicle-treated mouse stained with CD45, revealing extensive CD45+ leukocyte infiltration. In contrast, images of whole kidney sections from the treated group revealed a marked reduction in CD45+ leukocyte infiltration post-treatment. **B.** PAS staining of paraffin-embedded kidney sections. Black arrows indicate interstitial inflammatory infiltration, arrowheads indicate dilated TALs. Scale bar = 40  $\mu\text{m}$ .



## Graphical abstract

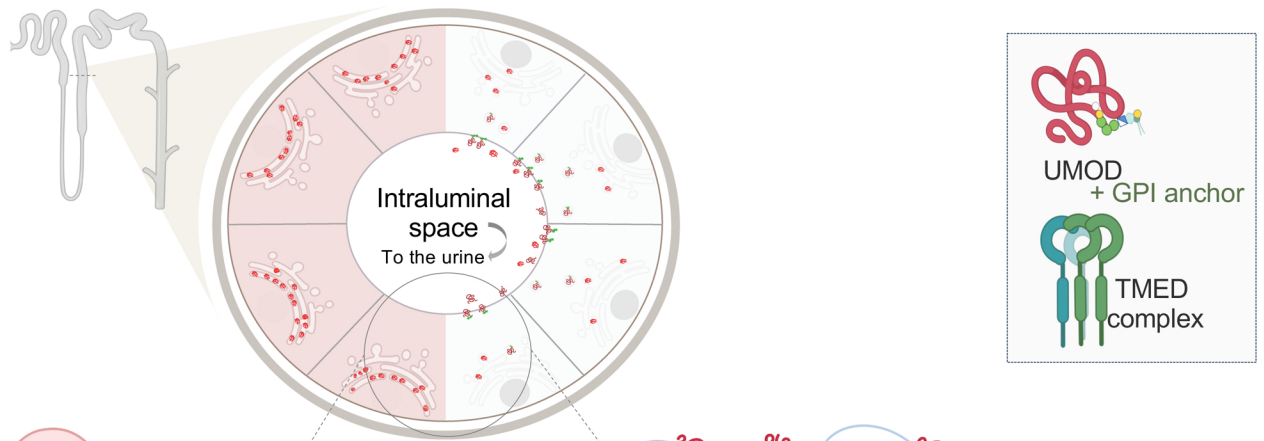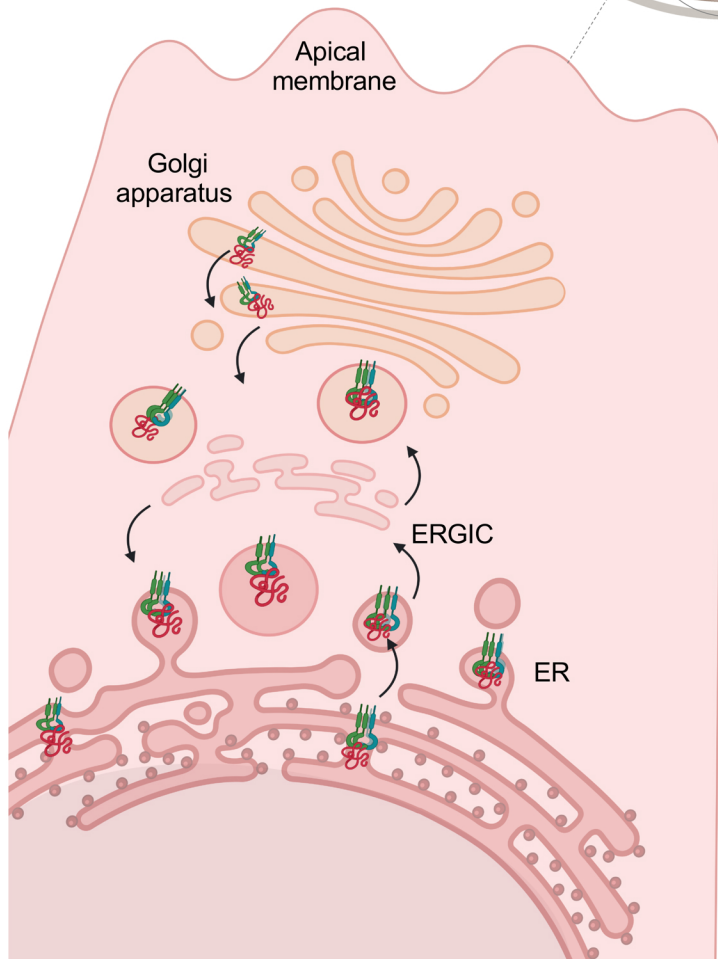

Disease

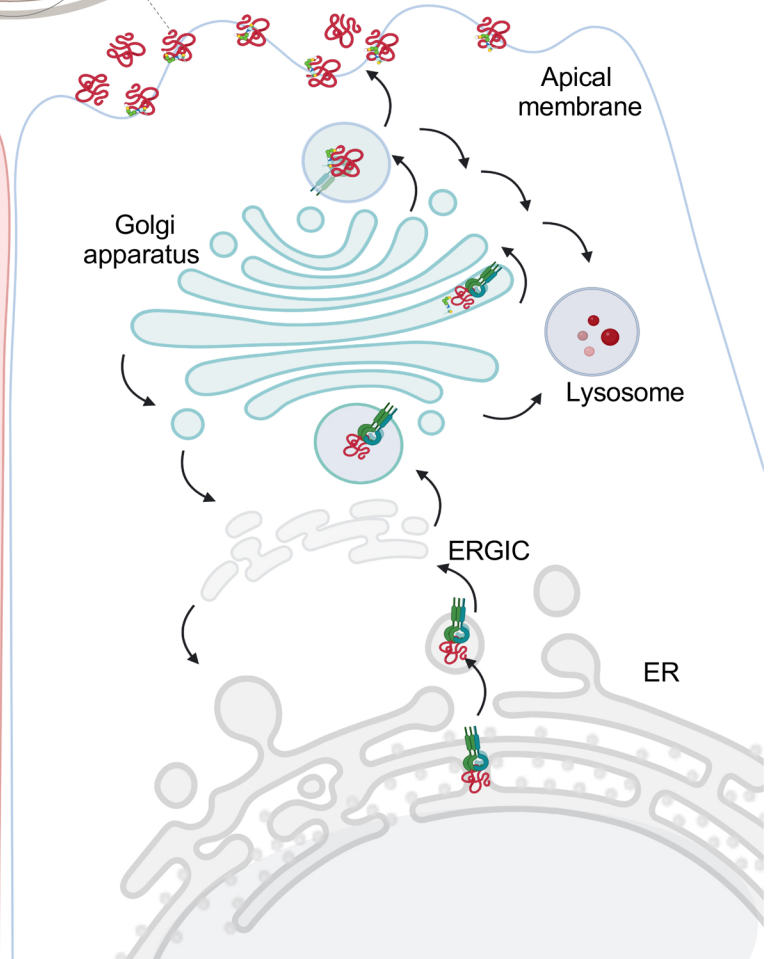

+ Treatment

Targeting TMEDs corrects UMOD trafficking, alleviates ER stress, and mitigates other pathological effects. Schematic depicts isolated tubules: on the left, vehicle-treated mice display intracellular UMOD accumulation and expanded ER. On the right, BRD4780-treated mice exhibit UMOD correctly localized at the apical membrane, tethered via GPI-anchor (green).
